# Supplementary material
Source: Springer Nature journal article supplement (https://www.springermedizin.de/resource/supplementary/12889_2013_7352_MOESM5_ESM.pdf/9499308)

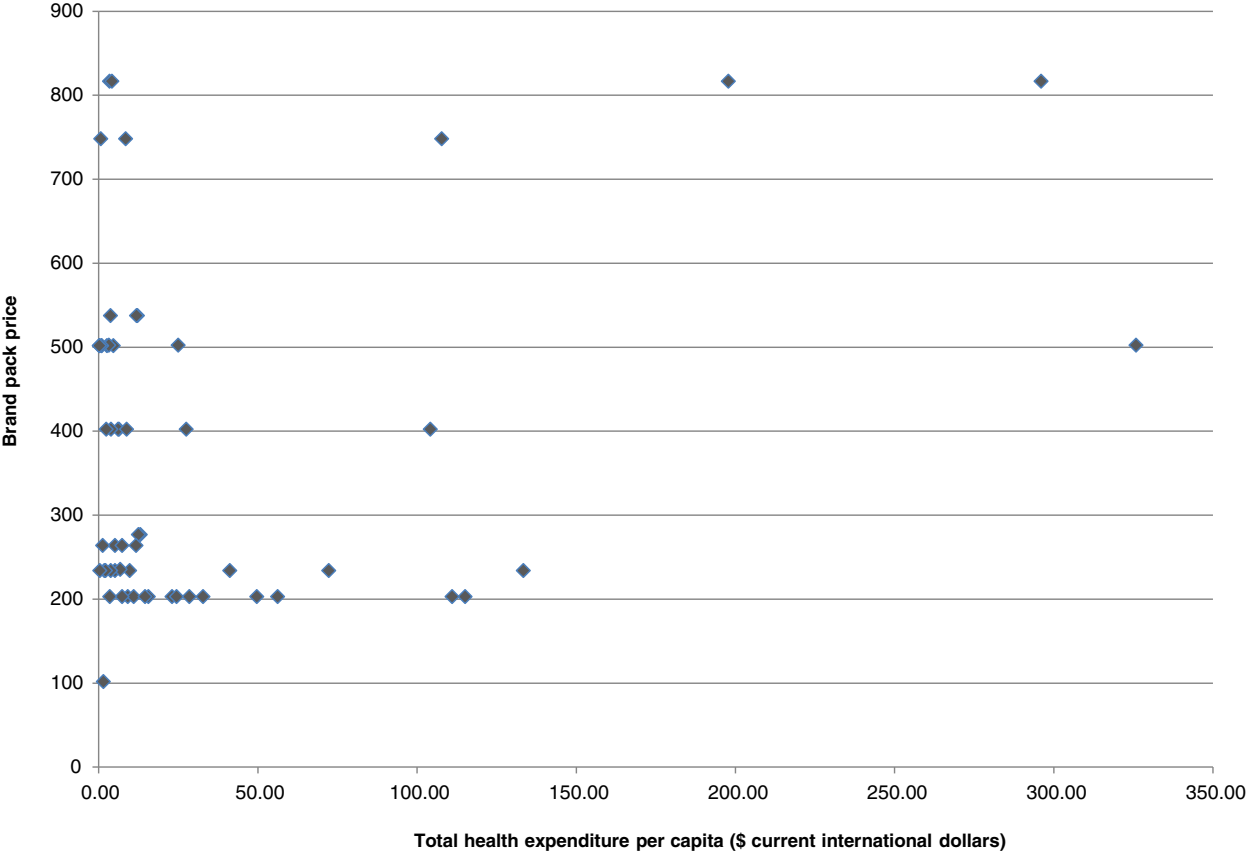

Supplement: MOESM5 [file 9499308]
